# Supplementary material for: Hierarchical Porous LiNi1/3Co1/3Mn1/3O2 Nano-/Micro Spherical Cathode Material: Minimized Cation Mixing and Improved Li+ Mobility for Enhanced Electrochemical Performance
Source: PubMed Central journal article supplement (PMC4868989; doi:10.1038/srep25771), 2016-05-17
Supplement: srep25771-s1.pdf [file srep25771-s1.pdf]

Supporting Information

# **Hierarchical Porous LiNi<sub>1/3</sub>Co<sub>1/3</sub>Mn<sub>1/3</sub>O<sub>2</sub> Nano-/Micro Spherical Cathode Material: Minimized Cation Mixing and Improved Li<sup>+</sup> Mobility for Enhanced Electrochemical Performance**

Zhen Chen<sup>1,2</sup>, Jin Wang<sup>1,2</sup>, Dongliang Chao<sup>2</sup>, Tom Baikie<sup>3</sup>, Linyi Bai<sup>4</sup>, Shi Chen<sup>2</sup>, Yanli Zhao<sup>4,5</sup>,

Tze Chien Sum<sup>2</sup>, Jianyi Lin<sup>3</sup> \* , Zexiang Shen<sup>2,3</sup> \*

**1**Energy Research Institute (ERI@N), Interdisciplinary Graduate School, Nanyang

Technological University, Research Techno Plaza, 50 Nanyang Drive, 637553, Singapore

**2**Division of Physics and Applied Physics, School of Physical and Mathematical Sciences,

Nanyang Technological University, 21 Nanyang Link, 637371, Singapore

**3**Energy Research Institute (ERI@N), Nanyang Technological University, 50 Nanyang Drive,

637553, Singapore

**4**Division of Chemistry and Biological Chemistry, School of Physical and Mathematical Sciences,

Nanyang Technological University, 21 Nanyang Link, 637371, Singapore

**5**School of Materials Science and Engineering, Nanyang Technological University, 639798,

Singapore

\* Email: zexiang@ntu.edu.sg, Lijy@ntu.edu.sg

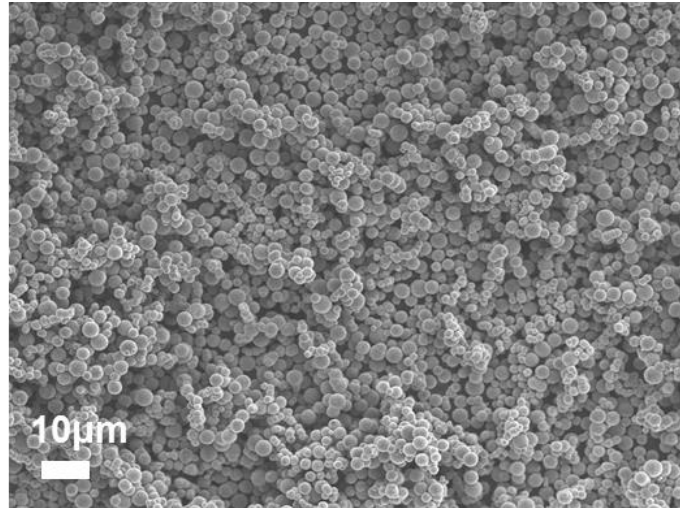

Figure S1. FESEM image of porous fluffy MnO<sub>2</sub>.

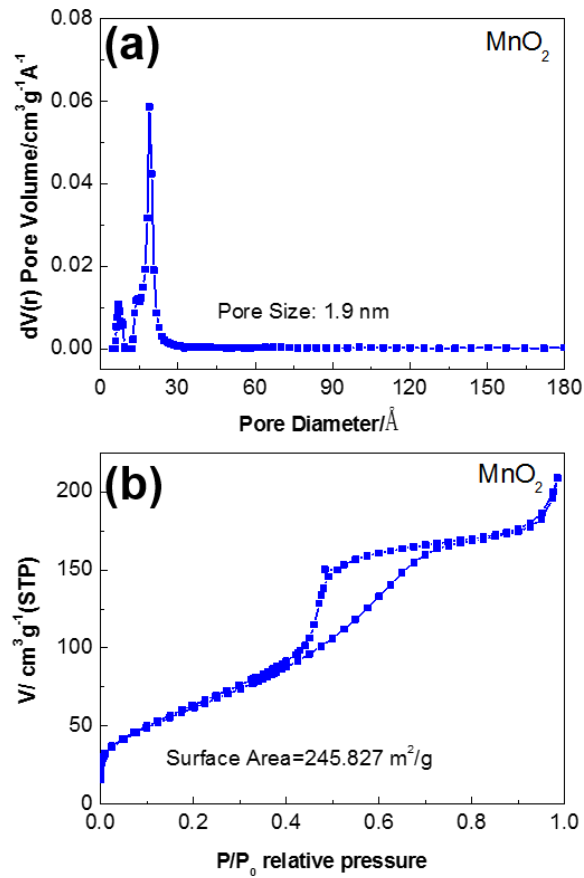

Figure S2. (a) The pore size distribution, and (b) N<sub>2</sub> adsorption/desorption isotherms of fluffy MnO<sub>2</sub>.

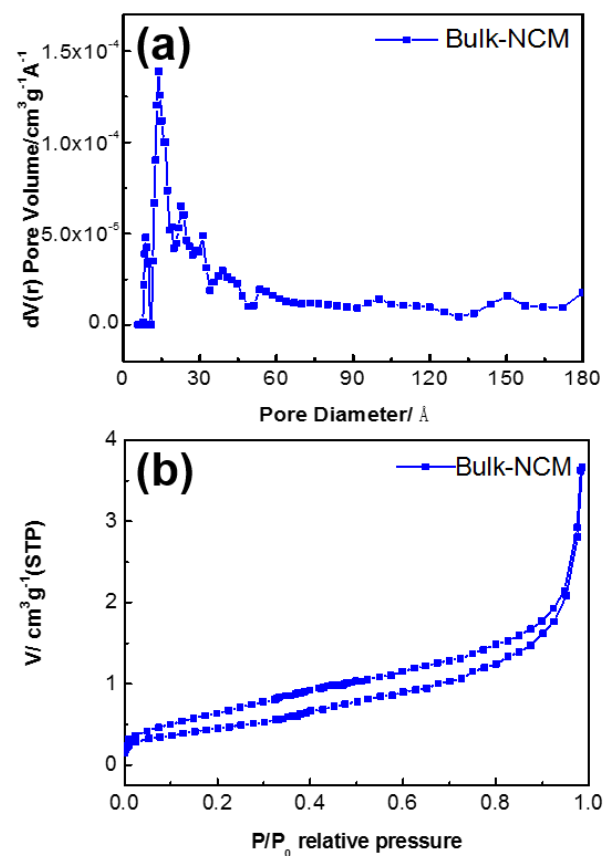

Figure S3. (a) The pore size distribution, and (b) N<sub>2</sub> adsorption/desorption isotherms of Bulk-NCM.

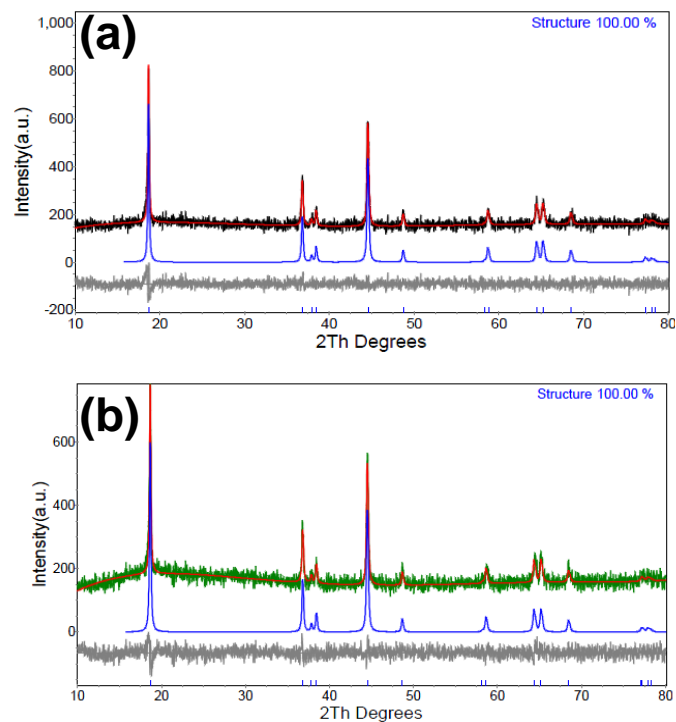

Figure S4. Rietveld refinement of the XRD data for (a) PNM-NCM; (b) Bulk NCM.

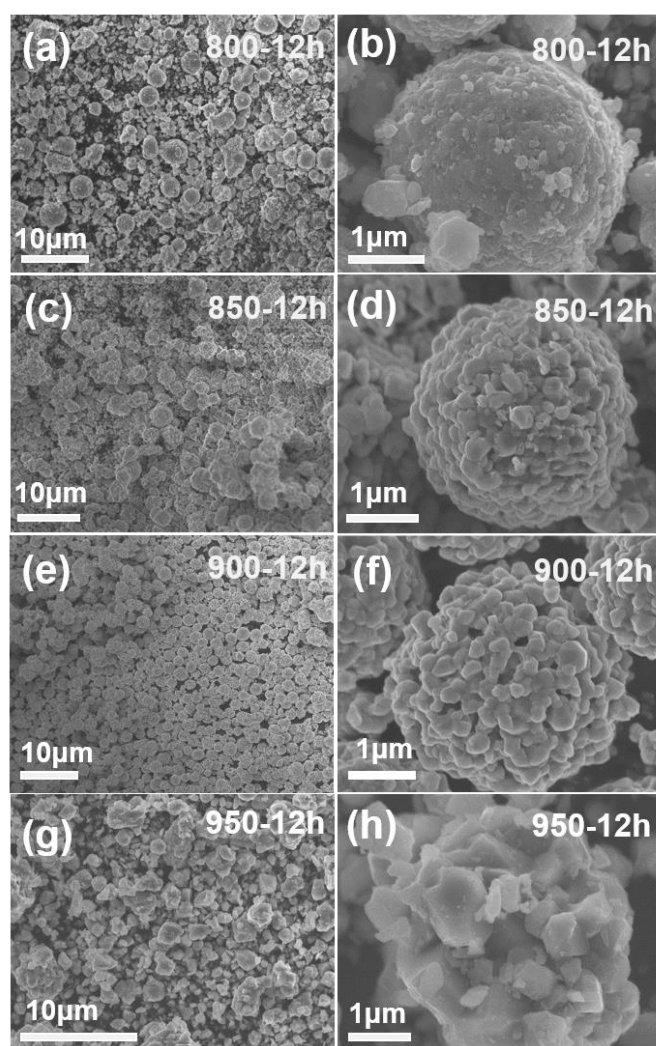

Figure S5. FESEM images of NCM microspheres calcined at different temperature: (a) and (b) 800 °C; (c) and (d) 850 °C; (e) and (f) 900 °C; (g) and (h) 950 °C.

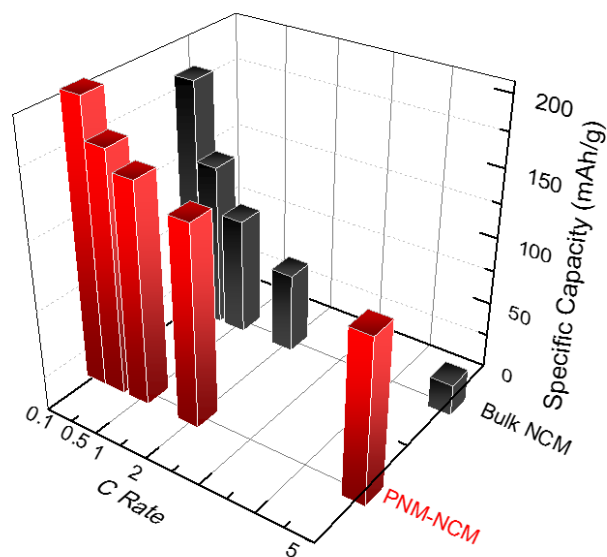

Figure S6. The comparisons of rate capability of electrodes made by PNM-NCM (red columns) and Bulk-NCM (black columns).

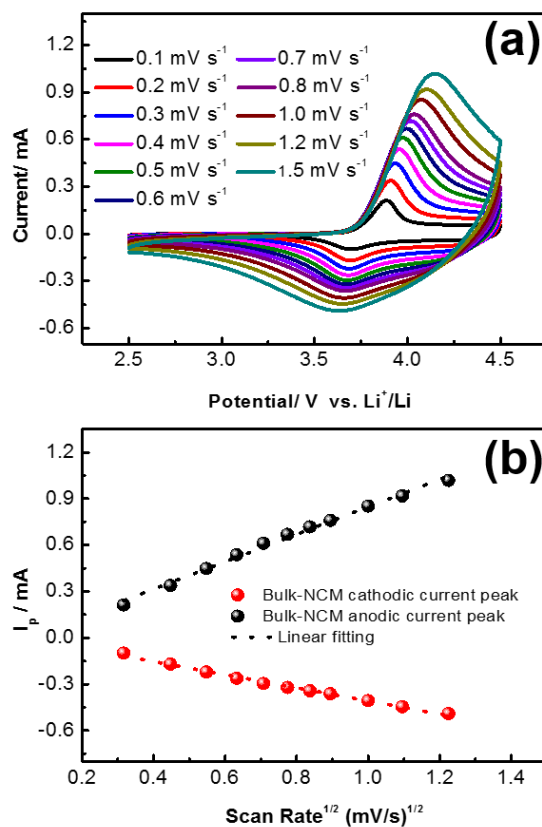

Figure S7. (a) Cyclic voltammetric profiles at various scan rates of 0.1-1.5  $\text{mV s}^{-1}$ , (b) Linear response of the peak current density as a function of the square root of scan rate of Bulk-NCM.

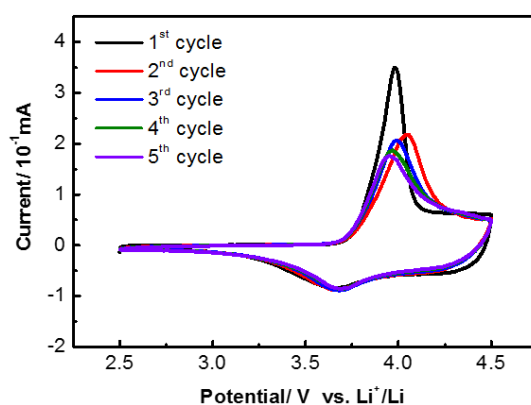

**Figure S8.** The first five consecutive cyclic voltammograms curves at a scan rate of  $0.1 \text{ mV s}^{-1}$  over the voltage range 2.5-4.5 V versus  $\text{Li}^+/\text{Li}$  of Bulk-NCM.

**Table 1.** Summary of PNM-NCM Refinement

| Cell Parameters                                                     |         |         |         |                  |       |
|---------------------------------------------------------------------|---------|---------|---------|------------------|-------|
| Space Group                                                         | R3m     |         |         |                  |       |
| a=2.860(2)Å; c=14.216(8) Å; V=100.50 Å <sup>3</sup> ; Z=3           |         |         |         |                  |       |
| I(003)/I(103)=1.399; R=0.875; crystal size=56.6nm,<br>R-factor=0.52 |         |         |         |                  |       |
| Atomic Positions                                                    |         |         |         |                  |       |
| site                                                                | x       | y       | z       | atom             | fract |
| 3a                                                                  | 0.00000 | 0.00000 | 0.00000 | $\text{Li}^{1+}$ | 0.981 |
| 3a                                                                  | 0.00000 | 0.00000 | 0.00000 | $\text{Ni}^{2+}$ | 0.019 |
| 3b                                                                  | 0.00000 | 0.00000 | 0.50000 | $\text{Li}^{1+}$ | 0.019 |
| 3b                                                                  | 0.00000 | 0.00000 | 0.50000 | $\text{Ni}^{2+}$ | 0.314 |
| 3b                                                                  | 0.00000 | 0.00000 | 0.50000 | $\text{Co}^{3+}$ | 0.333 |
| 3b                                                                  | 0.00000 | 0.00000 | 0.50000 | $\text{Mn}^{4+}$ | 0.333 |
| 6c                                                                  | 0.00000 | 0.00000 | 0.26030 | $\text{O}^{2-}$  | 1     |

**Table 1.** XRD pattern refinement parameters of PNM-NCM microspheres.

**Table 2.** Summary of bulk NCM Refinement

| Cell Parameters                                                     |         |         |         |                  |       |
|---------------------------------------------------------------------|---------|---------|---------|------------------|-------|
| Space Group                                                         | R3m     |         |         |                  |       |
| a=2.865(2)Å; c=14.281(8) Å; V=101.50 Å <sup>3</sup> ; Z=3           |         |         |         |                  |       |
| I(003)/I(103)=1.484; R=1.583; crystal size=97.0nm,<br>R-factor=0.58 |         |         |         |                  |       |
| Atomic Positions                                                    |         |         |         |                  |       |
| site                                                                | x       | y       | z       | atom             | fract |
| 3a                                                                  | 0.00000 | 0.00000 | 0.00000 | $\text{Li}^{1+}$ | 0.957 |
| 3a                                                                  | 0.00000 | 0.00000 | 0.00000 | $\text{Ni}^{2+}$ | 0.043 |
| 3b                                                                  | 0.00000 | 0.00000 | 0.50000 | $\text{Li}^{1+}$ | 0.057 |
| 3b                                                                  | 0.00000 | 0.00000 | 0.50000 | $\text{Ni}^{2+}$ | 0.276 |
| 3b                                                                  | 0.00000 | 0.00000 | 0.50000 | $\text{Co}^{3+}$ | 0.333 |
| 3b                                                                  | 0.00000 | 0.00000 | 0.50000 | $\text{Mn}^{4+}$ | 0.333 |
| 6c                                                                  | 0.00000 | 0.00000 | 0.26030 | $\text{O}^{2-}$  | 1     |

**Table 2.** XRD pattern refinement parameters of Bulk NCM.

| Reference        | Delithiation/ $\text{cm}^2 \text{s}^{-1}$ | Lithiation/ $\text{cm}^2 \text{s}^{-1}$   |
|------------------|-------------------------------------------|-------------------------------------------|
| S1 <sup>1</sup>  | $1.39 \times 10^{-10}$                    | $1.51 \times 10^{-10}$                    |
| S2 <sup>2</sup>  | $4.4 \times 10^{-10}$                     | $2.6 \times 10^{-10}$                     |
| S3 <sup>3</sup>  | $6.6 \times 10^{-10}$                     | $3.9 \times 10^{-10}$                     |
| S4 <sup>4</sup>  | $2.04 \times 10^{-8}$                     | $6.12 \times 10^{-9}$                     |
| S5 <sup>5</sup>  | $7.8 \times 10^{-10}$                     | $4.3 \times 10^{-10}$                     |
| <b>This work</b> | <b><math>3.126 \times 10^{-9}</math></b>  | <b><math>6.921 \times 10^{-10}</math></b> |

**Table 3.** Comparison of apparent diffusion coefficient of lithium ions among the references.

| PNM-NCM        | 1 <sup>st</sup> cycle | 2 <sup>nd</sup> cycle | 3 <sup>rd</sup> cycle | 4 <sup>th</sup> cycle | 5 <sup>th</sup> cycle |
|----------------|-----------------------|-----------------------|-----------------------|-----------------------|-----------------------|
| Oxidation Peak | 3.950                 | 3.798                 | 3.792                 | 3.788                 | 3.792                 |
| Reduction Peak | 3.732                 | 3.727                 | 3.730                 | 3.724                 | 3.720                 |
| Bulk NCM       | 1 <sup>st</sup> cycle | 2 <sup>nd</sup> cycle | 3 <sup>rd</sup> cycle | 4 <sup>th</sup> cycle | 5 <sup>th</sup> cycle |
| Oxidation Peak | 3.980                 | 4.045                 | 3.992                 | 3.966                 | 3.953                 |
| Reduction Peak | 3.668                 | 3.668                 | 3.682                 | 3.690                 | 3.690                 |

**Table 4.** Peak positions of the initial five consecutive cyclic voltammetric curves of PNM-NCM and bulk-NCM microspheres at a scan rate of  $0.1 \text{ mV s}^{-1}$  in the voltage range 2.5-4.5 V versus  $\text{Li}^+/\text{Li}$ .

| Reference         | Year       | Journal                     | Redox Peak Separation Value |
|-------------------|------------|-----------------------------|-----------------------------|
| S1 <sup>6</sup>   | Sept, 2010 | Scripta Materialia          | ~0.2V                       |
| S2 <sup>3</sup>   | May, 2011  | J. Mater. Chem.             | ~0.3V                       |
| S3 <sup>4</sup>   | Jun, 2013  | Nano Energy                 | ~0.2V                       |
| S4 <sup>7</sup>   | Jul, 2013  | J. Mater. Chem.A            | ~0.23V                      |
| S5 <sup>8</sup>   | Feb, 2014  | Journal of Power Sources    | ~0.1V                       |
| S6 <sup>9</sup>   | Mar, 2014  | ACS Appl. Mater. Interfaces | ~0.18V                      |
| S7 <sup>10</sup>  | Aug, 2014  | Journal of Power Sources    | ~0.23V                      |
| S8 <sup>11</sup>  | Jul, 2015  | J. Mater. Chem.A            | ~0.27V                      |
| S9 <sup>5</sup>   | Jul, 2015  | Nano Energy                 | ~0.2V                       |
| S10 <sup>12</sup> | Sept, 2015 | ACS Appl. Mater. Interfaces | ~0.3V                       |

**Table 5. Comparison of redox peak separation values among the references.**



## References in ESI:

- 1 Zheng, J. *et al.* Electrochemical Performance of the  $\text{LiNi}_{1/3}\text{Mn}_{1/3}\text{Co}_{1/3}\text{O}_2$  in Aqueous Electrolyte. *J. Electrochem. Soc.* **157**, A702, doi:10.1149/1.3374663 (2010).
- 2 Zhang, X. *et al.* Synthesis and characterization of  $\text{LiNi}_{1/3}\text{Mn}_{1/3}\text{Co}_{1/3}\text{O}_2$  by wet-chemical method. *Electrochim. Acta* **55**, 6440-6449, doi:http://dx.doi.org/10.1016/j.electacta.2010.06.040 (2010).
- 3 Huang, Z.-D. *et al.* Microscopically porous, interconnected single crystal  $\text{LiNi}_{1/3}\text{Mn}_{1/3}\text{Co}_{1/3}\text{O}_2$  cathode material for Lithium ion batteries. *J. Mater. Chem.* **21**, 10777-10784, doi:10.1039/C1JM00059D (2011).
- 4 Li, J., Xiong, S., Liu, Y., Ju, Z. & Qian, Y. Uniform  $\text{LiNi}_{1/3}\text{Mn}_{1/3}\text{Co}_{1/3}\text{O}_2$  hollow microspheres: Designed synthesis, topotactical structural transformation and their enhanced electrochemical performance. *Nano Energy* **2**, 1249-1260, doi:http://dx.doi.org/10.1016/j.nanoen.2013.06.003 (2013).
- 5 Peng, L., Zhu, Y., Khakoo, U., Chen, D. & Yu, G. Self-assembled  $\text{LiNi}_{1/3}\text{Mn}_{1/3}\text{Co}_{1/3}\text{O}_2$  nanosheet cathodes with tunable rate capability. *Nano Energy* **17**, 36-42, doi:10.1016/j.nanoen.2015.07.031 (2015).
- 6 Huang, Z.-D. *et al.*  $\text{LiNi}_{1/3}\text{Mn}_{1/3}\text{Co}_{1/3}\text{O}_2$  with a novel one-dimensional porous structure: A high-power cathode material for rechargeable Li-ion batteries. *Scr. Mater.* **64**, 122-125, doi:http://dx.doi.org/10.1016/j.scriptamat.2010.09.018 (2011).
- 7 Li, J., Cao, C., Xu, X., Zhu, Y. & Yao, R.  $\text{LiNi}_{1/3}\text{Mn}_{1/3}\text{Co}_{1/3}\text{O}_2$  hollow nano-micro hierarchical microspheres with enhanced performances as cathodes for lithium-ion batteries. *J. Mater. Chem. A* **1**, 11848-11852, doi:10.1039/C3TA12375H (2013).
- 8 Ryu, W.-H., Lim, S.-J., Kim, W.-K. & Kwon, H. 3-D dumbbell-like  $\text{LiNi}_{1/3}\text{Mn}_{1/3}\text{Co}_{1/3}\text{O}_2$  cathode materials assembled with nano-building blocks for lithium-ion batteries. *J. Power Sources* **257**, 186-191, doi:http://dx.doi.org/10.1016/j.jpowsour.2014.02.003 (2014).
- 9 Li, J., Yao, R. & Cao, C.  $\text{LiNi}_{1/3}\text{Mn}_{1/3}\text{Co}_{1/3}\text{O}_2$  Nanoplates with {010} Active Planes Exposing Prepared in Polyol Medium as a High-Performance Cathode for Li-Ion Battery. *ACS Appl. Mater. Interfaces* **6**, 5075-5082, doi:10.1021/am500215b (2014).
- 10 Yang, Z. *et al.* Stepwise co-precipitation to synthesize  $\text{LiNi}_{1/3}\text{Mn}_{1/3}\text{Co}_{1/3}\text{O}_2$  one-dimensional hierarchical structure for lithium ion batteries. *J. Power Sources* **272**, 144-151, doi:http://dx.doi.org/10.1016/j.jpowsour.2014.08.052 (2014).
- 11 Wu, Y., Cao, C., Zhu, Y., Li, J. & Wang, L. Cube-shaped hierarchical  $\text{LiNi}_{1/3}\text{Mn}_{1/3}\text{Co}_{1/3}\text{O}_2$  with enhanced growth of nanocrystal planes as high-performance cathode materials for lithium-ion batteries. *J. Mater. Chem. A* **3**, 15523-15528, doi:10.1039/c5ta03225c (2015).
- 12 Li, L. *et al.* Structural and Electrochemical Study of Hierarchical  $\text{LiNi}_{1/3}\text{Mn}_{1/3}\text{Co}_{1/3}\text{O}_2$  Cathode Material for Lithium-Ion Batteries. *ACS Appl. Mater. Interfaces* **7**, 21939-21947, doi:10.1021/acsami.5b06584 (2015).
